# Supplementary material
Source: PubMed Central journal article supplement (PMC7561447)
Supplement: NIHMS1635589-supplement-1.pdf [file NIHMS1635589-supplement-1.pdf]

Cell Reports, Volume 33

## Supplemental Information

### **MED19 Regulates Adipogenesis and Maintenance of White Adipose Tissue Mass by Mediating PPAR $\gamma$ -Dependent Gene Expression**

**John M. Dean, Anyuan He, Min Tan, Jun Wang, Dongliang Lu, Babak Razani, and Irfan J. Lodhi**

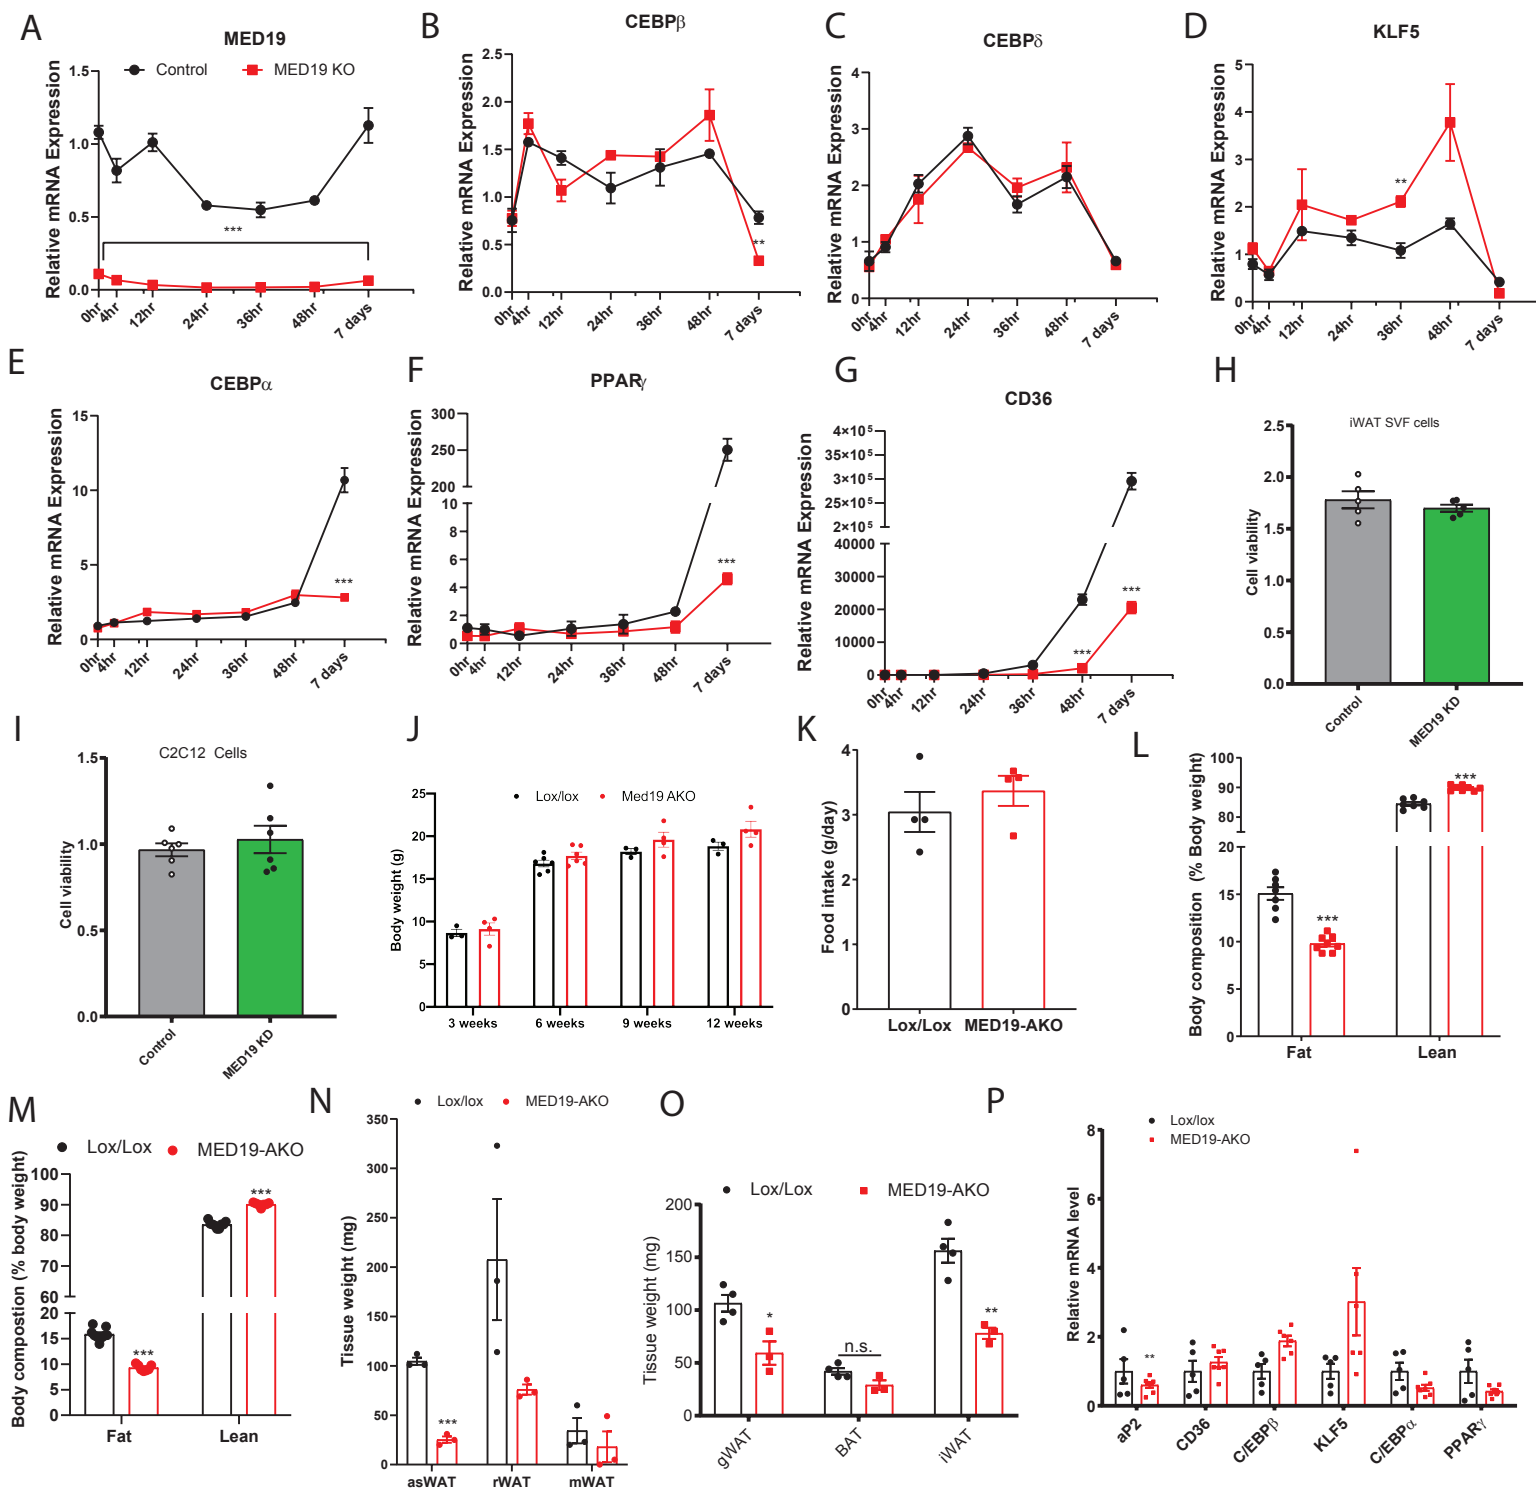

**Figure S1. Effect of MED19 knockout on adipocyte gene expression and characterization of MED19-AKO mice. Related to Figure 1.** (A-G) Gene expression time course of adipogenic genes in MED19-iKO iWAT SVF cells; n=3 each. (H-I) Cell viability in control and MED19 knockdown iWAT SVF cells and C2C12 cells measured using WST1 assay reagent. (J) Body weight of control and MED19-AKO female mice at 3 (n=3 Lox/Lox, 4 MED19-AKO), 6 (n=6 each), 9 (n=3 Lox/Lox, 4 MED19-AKO), and 12wk of age (n=3 Lox/Lox, 4 MED19-AKO). (K) Food intake in MED19-AKO and control male mice; n=4 each. (L) Body composition analysis by EchoMRI of 12wk old male mice; n=7 Lox/Lox, 8 MED19-AKO (M) Body composition analysis by EchoMRI of 12wk old female mice; n=9 Lox/Lox, 7 MED19-AKO. (N) Tissue weight of asWAT, rWAT, and mWAT of 12wk old male MED19-AKO mice; n=3 each. (O) Adipose tissue weights of 3wk old male MED19-AKO mice; n=4 Lox/Lox, 3 MED19-AKO. (P) qPCR analysis of gene expression in iWAT of MED19-AKO and control mice; n=5 Lox/Lox, 7 MED19-AKO. \*p < 0.05, \*\*p < 0.005, \*\*\*p < 0.0005.

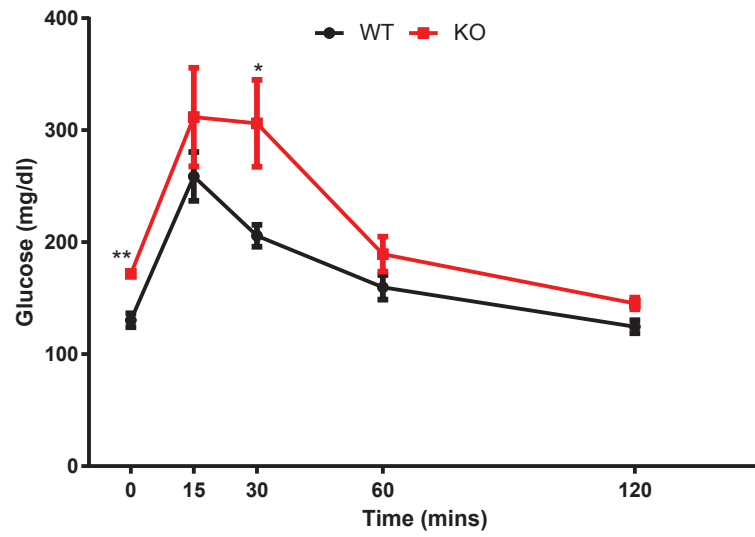

**Figure S2. Glucose tolerance test in female mice. Related to Figure 2.** Glucose tolerance test in control and MED19-AKO female mice; n=4 Lox/Lox, 3 MED19-AKO. \*p < 0.05.

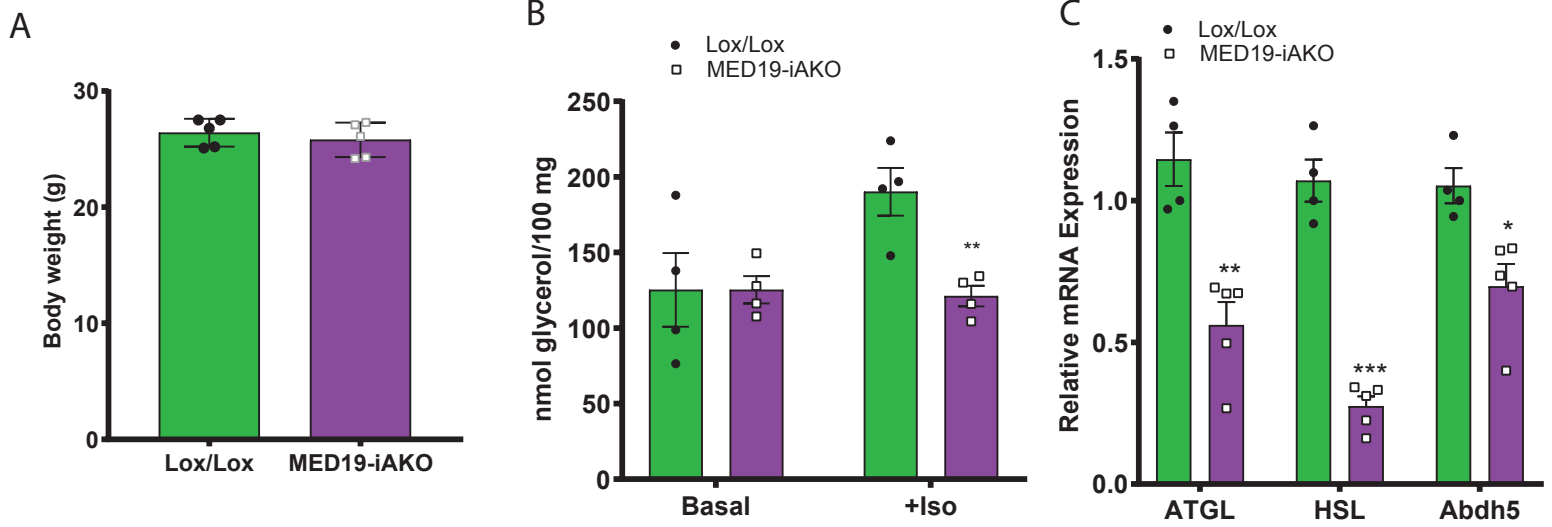

**Figure S3. Effect of inducible adipose-specific MED19 KO on body weight and lipolysis. Related to Figure 3.** (A) Body weight of MED19-iAKO mice 21 days following TAM injections; n=5 each. (B) Lipolysis assay in iWAT tissue explants from control and MED19-iAKO mice; n=4 each. (C) Expression of lipolysis genes was reduced in iWAT of MED19-iAKO mice; n=5 each. \*p < 0.05, \*\*p < 0.005, \*\*\*p < 0.0005.

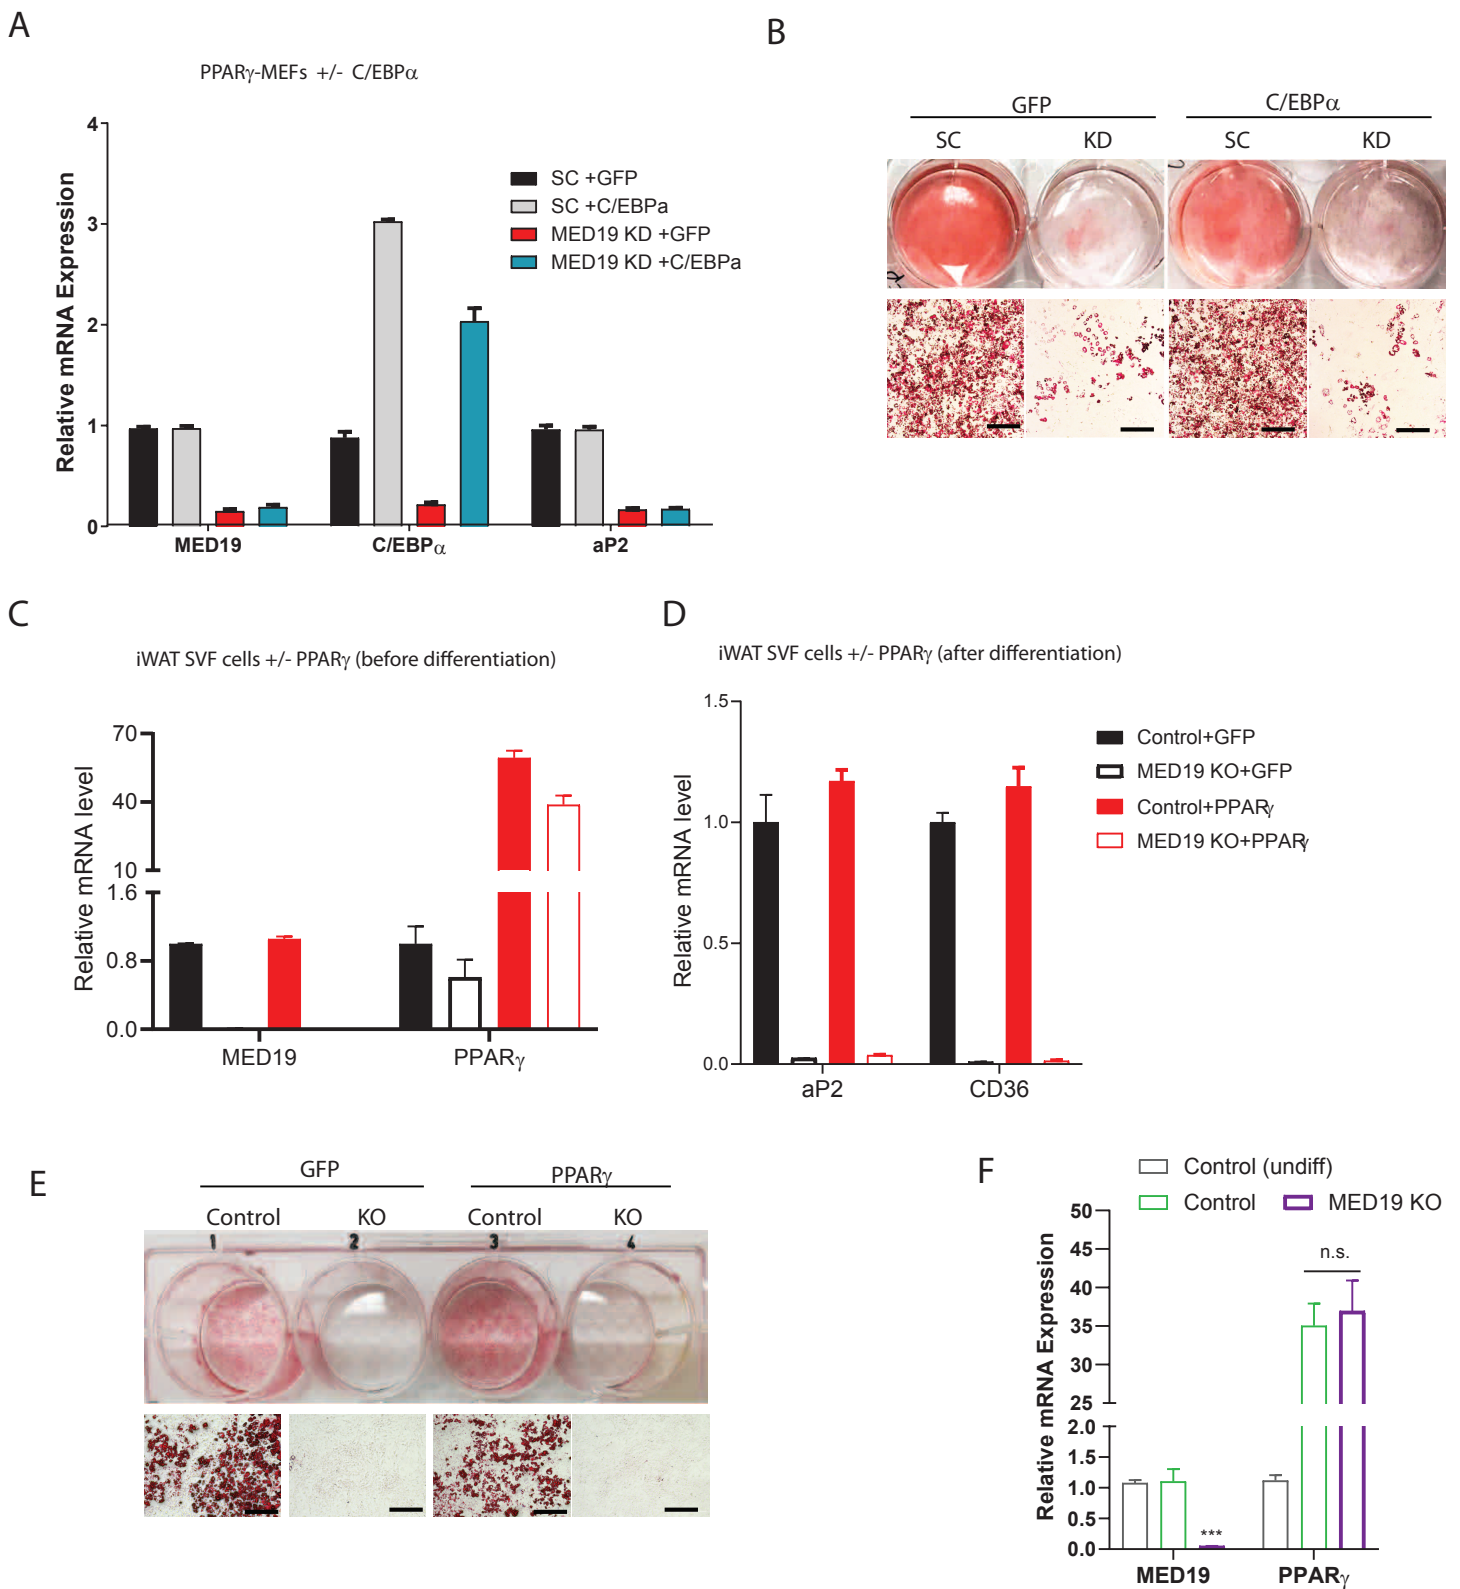

**Figure S4. PPAR $\gamma$  and/or C/EBP $\alpha$  overexpression does not rescue adipogenesis in MED19 depleted cells. Related to Figure 4. (A)** Gene expression analysis in differentiated PPAR $\gamma$ 2-MEFs overexpressing GFP or C/EBP $\alpha$  and treated with scrambled or MED19 shRNA; n=3 each. **(B)** Oil red O staining of the cells in panel A. Scale bar=300 $\mu$ m. **(C-D)** Gene expression analysis before **(C)** and after **(D)** differentiation of MED19-iKO cells overexpressing PPAR $\gamma$  and treated with vehicle or 4-hydroxy-tamoxifen to induce MED19 KO; n=2 each. **(E)** Oil red O staining in the cells from panel D. Scale bar=300 $\mu$ m. **(F)** Gene expression analysis of MED19-iKO cells under the same conditions used in the PLA assay in Figure 4J-K; n=3 each. \*p < 0.05, \*\*p < 0.005, \*\*\*p < 0.0005.

**Supplemental Table 1: Oligonucleotide sequences. Related to STAR Methods.**

| <b>Target</b>  | <b>Fwd (5' to 3')</b>   | <b>Rev (3' to 5')</b>     | <b>Reference</b>        |
|----------------|-------------------------|---------------------------|-------------------------|
| L32            | TTCCTGGTCCACAATGTCAA    | GGCTTTTCGGTTCTTAGAGGA     | This paper              |
| Cidea          | CAGTGATTTAAGAGACGCGG    | TCTGCAATCCCATGAATGTC      | This paper              |
| Med19          | AGTGGCCCCTTCTACCTGAT    | TAGGCCTGCTCCAGGTTGTA      | This paper              |
| aP2            | GCGTGGAATTCGATGAAATCA   | CCCGCCATCTAGGGTTATGA      | This paper              |
| C/EBP $\alpha$ | CCAAGAAGTCCGGTGGACAAG   | TTGTTTGGCTTTATCTCGGC      | This paper              |
| KLF5           | AGCGACGTATCCACTTCTGC    | CAGGTGCACTTGTAGGGCTT      | This paper              |
| Krox20         | TTGACCAGATGAACGGAGTG    | CAGGTGCACTTGTAGGGCTT      | This paper              |
| MyoD           | TACAGTGGCGACTCAGATGC    | GAGATGCGCTCCACTATGCT      | This paper              |
| MyoG           | CTACAGGCCTTGCTCAGCTC    | ACGATGGACGTAAGGGAGTG      | This paper              |
| Desmin         | GTGGATGCAGCCACTCTAGC    | TTAGCCGCGATGGTCTCATAAC    | This paper              |
| Myf5           | CAGCCCCACCTCCAACCTG     | GGGACCAGACAGGGCTGTTA      | This paper              |
| CD36           | GCGACATGATTAATGGCACA    | CCTGCAAATGTCAGAGGAAA      | This paper              |
| PRDM16         | CAGAGGTGTCATCCAGGAG     | ACGGATGTACTTGAGCCAGC      | This paper              |
| Pgc-1 $\alpha$ | TGTAGCGACCAATCGGAAAT    | TGAGGACCGCTAGCAAGTTT      | This paper              |
| Ebf2           | GCTGCGGGAACCGGAACGAGA   | ACACGACCTGGAACCGCCTCA     | This paper              |
| Lipe           | ACGCTACACAAAGGCTGCTT    | TCTCGTTGCGTTTGTAGTGC      | This paper              |
| Agpat2         | GAGCCTTCTACTTGGCCATCCA  | TTGATTGTTTCCTGAGGTGAAGAGC | This paper              |
| Retn           | AAGAACCCTTTCATTTCCCCTCC | GTCCAGCAATTTAAGCCAATGTT   | This paper              |
| ATGL           | CCAACGCCACTCACATCTAC    | GCCTCCTTGGACACCTCAAT      | This paper              |
| Abdh5          | TGGTGTCCCACATCTACATCA   | CAGCGTCCATATTCTGTTTCCA    | This paper              |
| FABP4-PPRE     | AA TGTCAGGCA TCTGGGAAC  | GACAAAGGCAGAAA TGCACA     | Lefterova et al., 2010  |
| CD36 PPRE      | CCAACGGAAGTGA TTTGAGC   | TTGCTGCTACACTCCAGCAT      | Lefterova et al., 2010  |
| Retn-ChIP      | AGATTCTATTGAGTCATTCACA  | AAGGGGCCTGTCCCTTTGGA      | Rajakumari et al., 2013 |
| Lipe-ChIP      | TGGGTCATAGTTGGCTAGGG    | CAGTGGGGACATGGTAAGT       | Rajakumari et al., 2013 |
| Agpat2-PPRE    | AGTCCTCAGACCACCTGACC    | TCCAGTCCTGTCTTCTCCA       | Villanueva et al., 2011 |
